# Supplementary material for: Fragile X Messenger Ribonucleoprotein 1 (FMR1), a novel inhibitor of osteoblast/osteocyte differentiation, regulates bone formation, mass, and strength in young and aged male and female mice
Source: PubMed Central journal article supplement (PMC10188597; doi:10.1038/s41413-023-00256-x), 2023-05-17
Supplement: 41413_2023_256_MOESM5_ESM.pdf [file 41413_2023_256_MOESM5_ESM.pdf]

**A** 2-month-old  
males

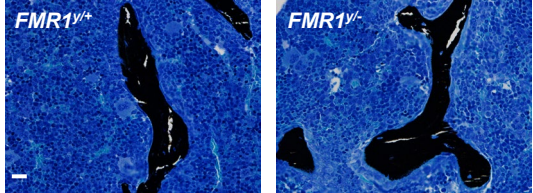

females

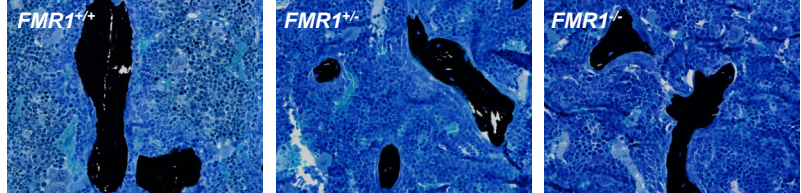

osteoblasts/osteoid

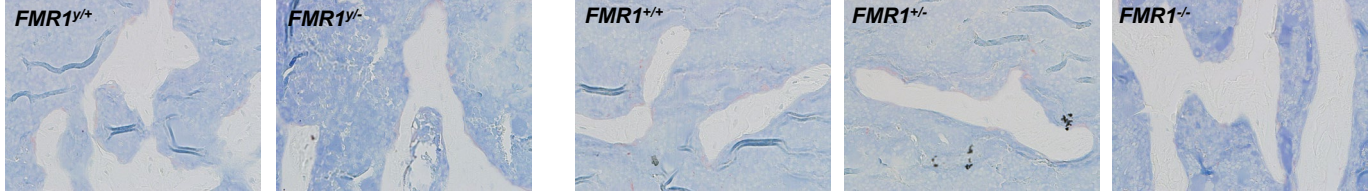

osteoclasts/eroded surface

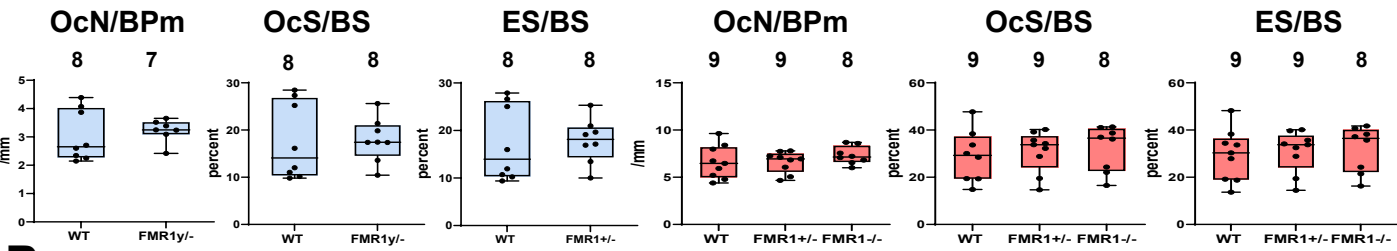

**B** 9-month-old  
males

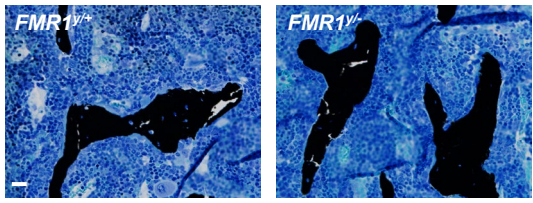

females

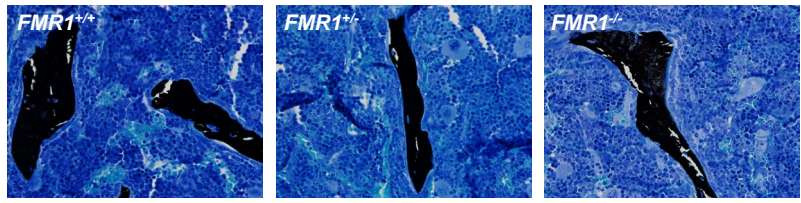

osteoblasts/osteoid

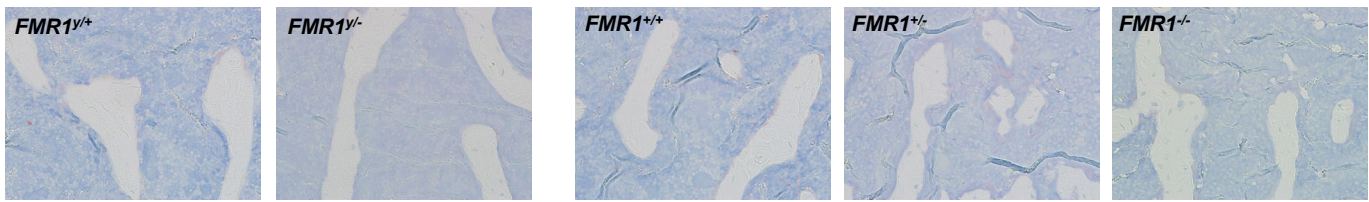

osteoclasts/eroded surface

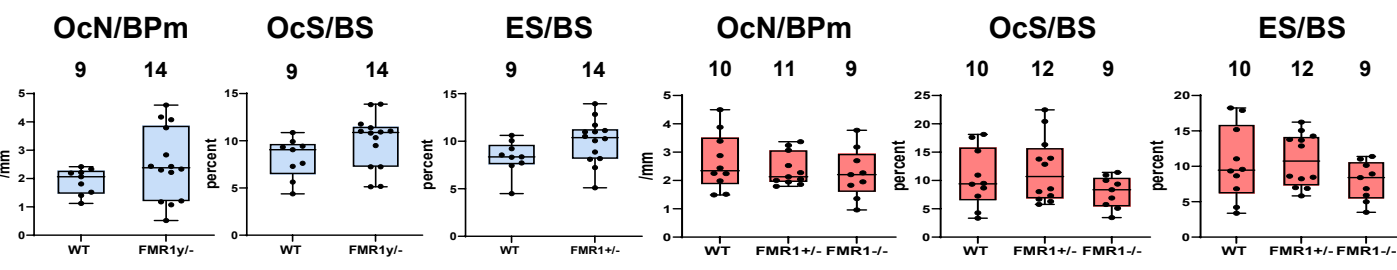

male female
